# Supplementary material for: Rapid Screening for CRISPR-Directed Editing of the Drosophila Genome Using white Coconversion
Source: PubMed Central journal article supplement (PMC5068941; doi:10.1534/g3.116.032557), 2016-08-19
Supplement: supp_g3.116.032557_FigureS1.pdf [file supp_g3.116.032557_FigureS1.pdf]

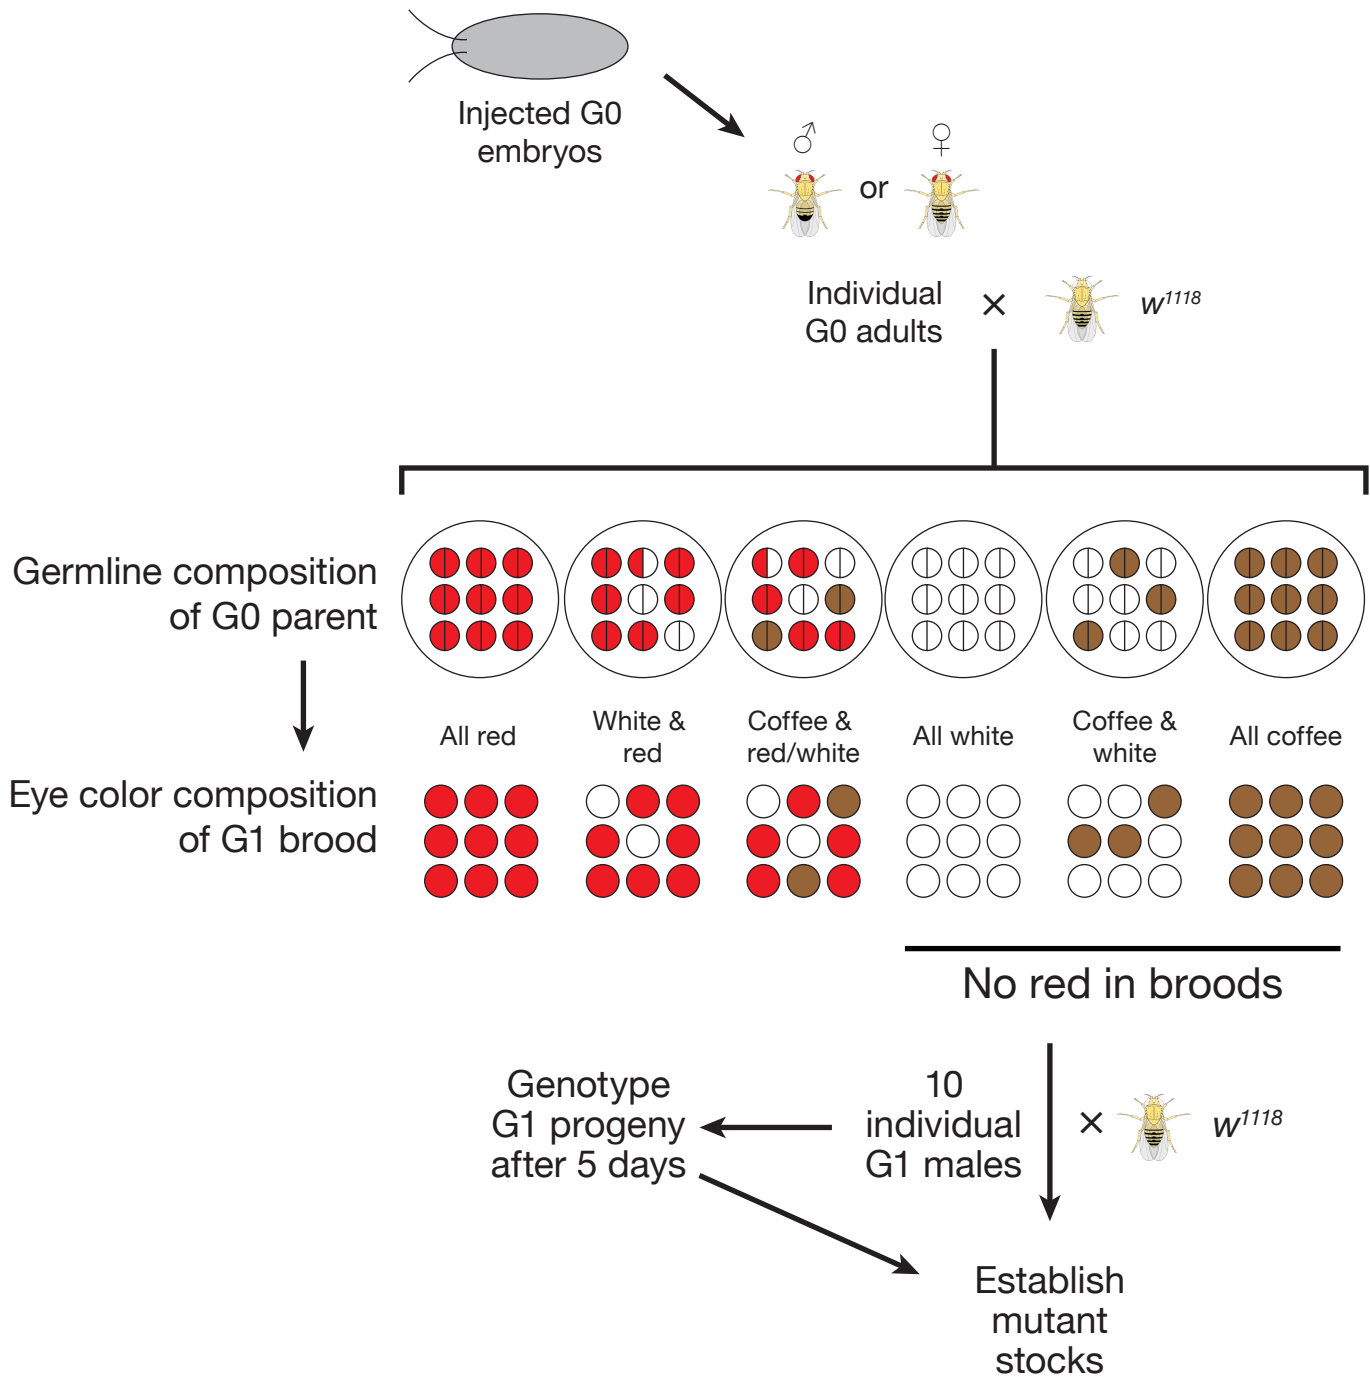

**Figure S1.** Genetic scheme used to screen and establish CRISPR-edited stocks.
